# Supplementary material for: Inhibitory Effect of an Acidic Peptide on the Activity of an Antimicrobial Peptide from the Scorpion Mesobuthus martensii Karsch
Source: PubMed Central journal article supplement (PMC6321396; doi:10.3390/molecules23123314), 2018-12-14
Supplement: molecules-23-03314-s001.pdf [file molecules-23-03314-s001.pdf]

## Supplementary

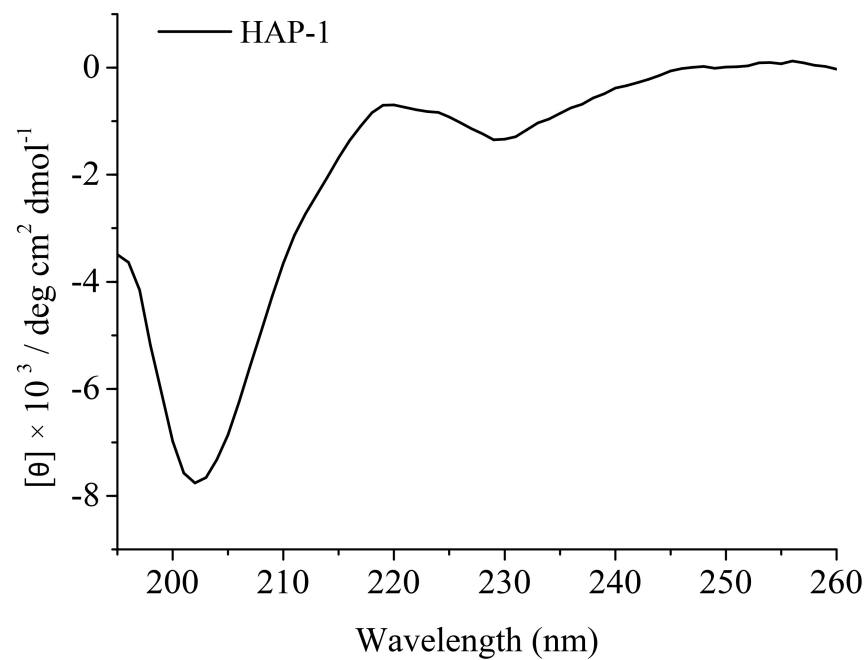

**Figure S1.** Far-UV CD spectrum of HAP-1. The concentration of the peptide was 1.0 mg/mL. Temperature was 25 °C.

**Table S1.** Deconvoluted CD spectra of HAP-1.

| Peptide | helix | $\beta$ -sheet | $\beta$ -turn | random coil |
|---------|-------|----------------|---------------|-------------|
| HAP-1   | 27%   | 28%            | 19%           | 26%         |
